# Supplementary material for: Transformation of Compatible Mating-Type Genes in Monokaryons Triggers Fruiting Body Development by Activating Mating Pathways in Pleurotus eryngii
Source: PubMed Central journal article supplement (PMC10100773; doi:10.1128/spectrum.05272-22), 2023-03-14

## Supplemental legends:

Figure S1. Gene ontology (GO) analyses of the DEGs between the monokaryon strain 183 and transformant T7.

Figure S2. Kyoto Encyclopedia of Genes and Genomes (KEGG) analyses of the DEGs between the monokaryon strain 183 and transformant T7.

Table S1. Genome-wide gene expression levels of the samples.

Table S2. Differentially expressed genes (DEGs) among the samples.

Table S3. Primers used for qRT-PCR.

# Figure S1

## GO Enrichment

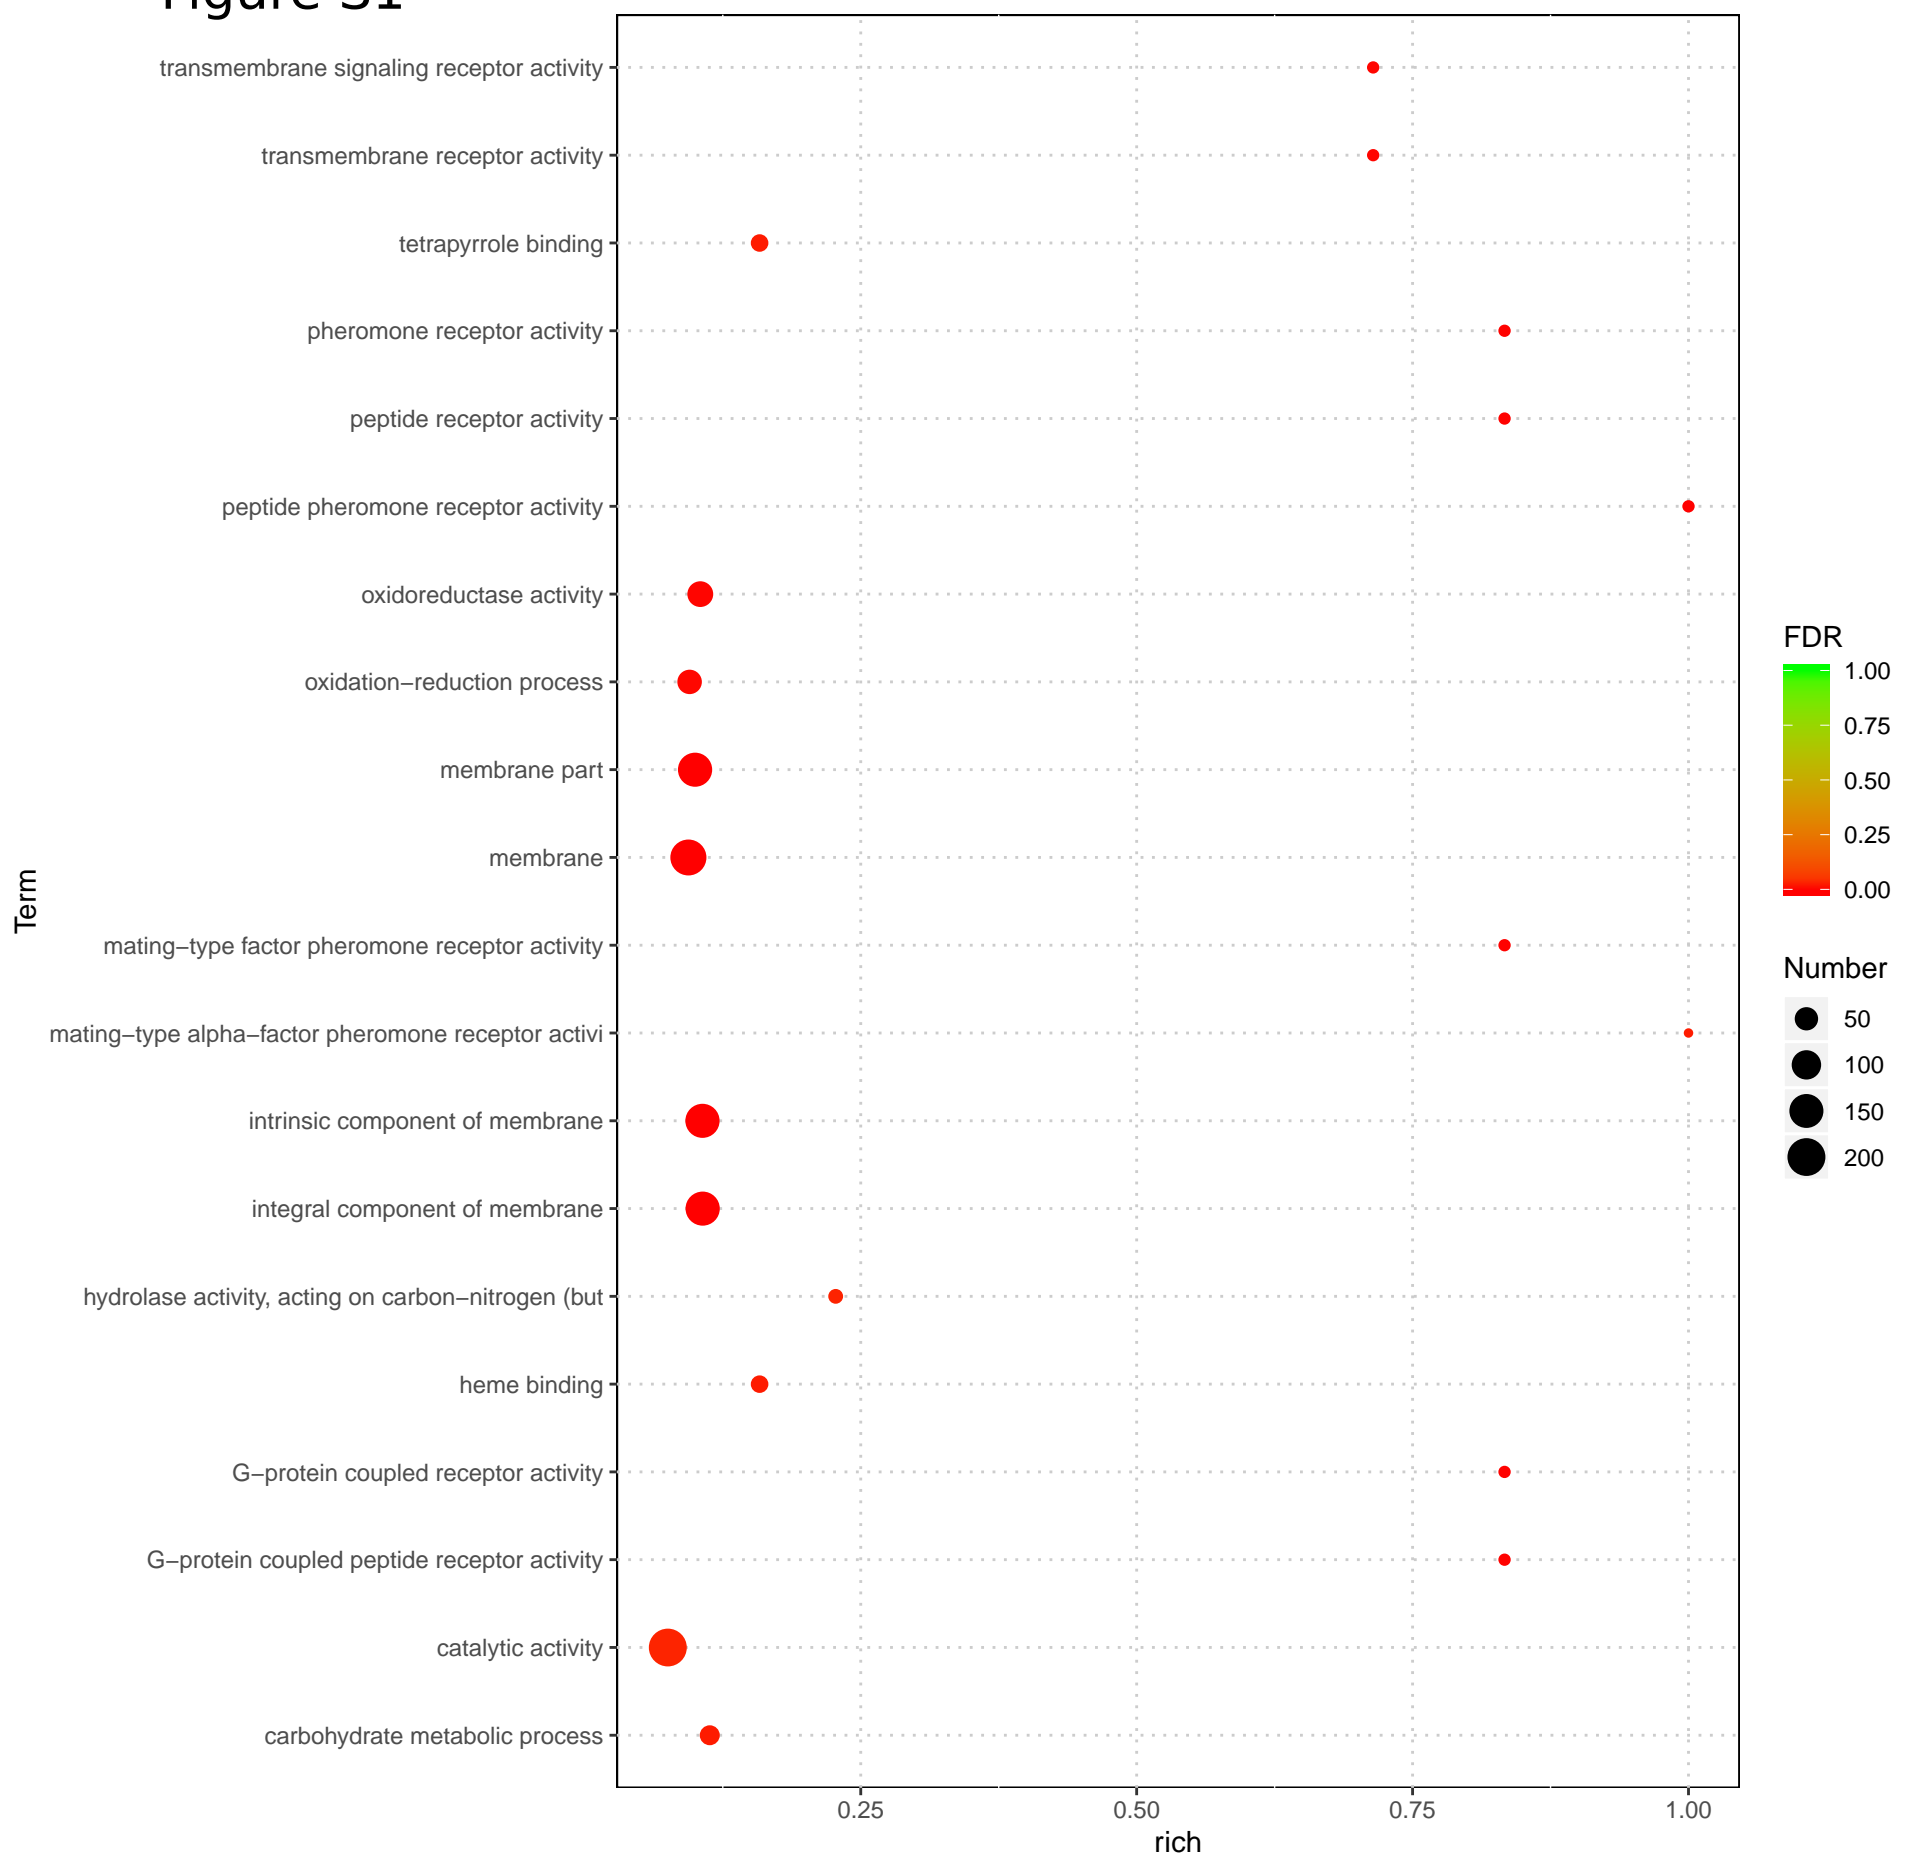

Figure S2

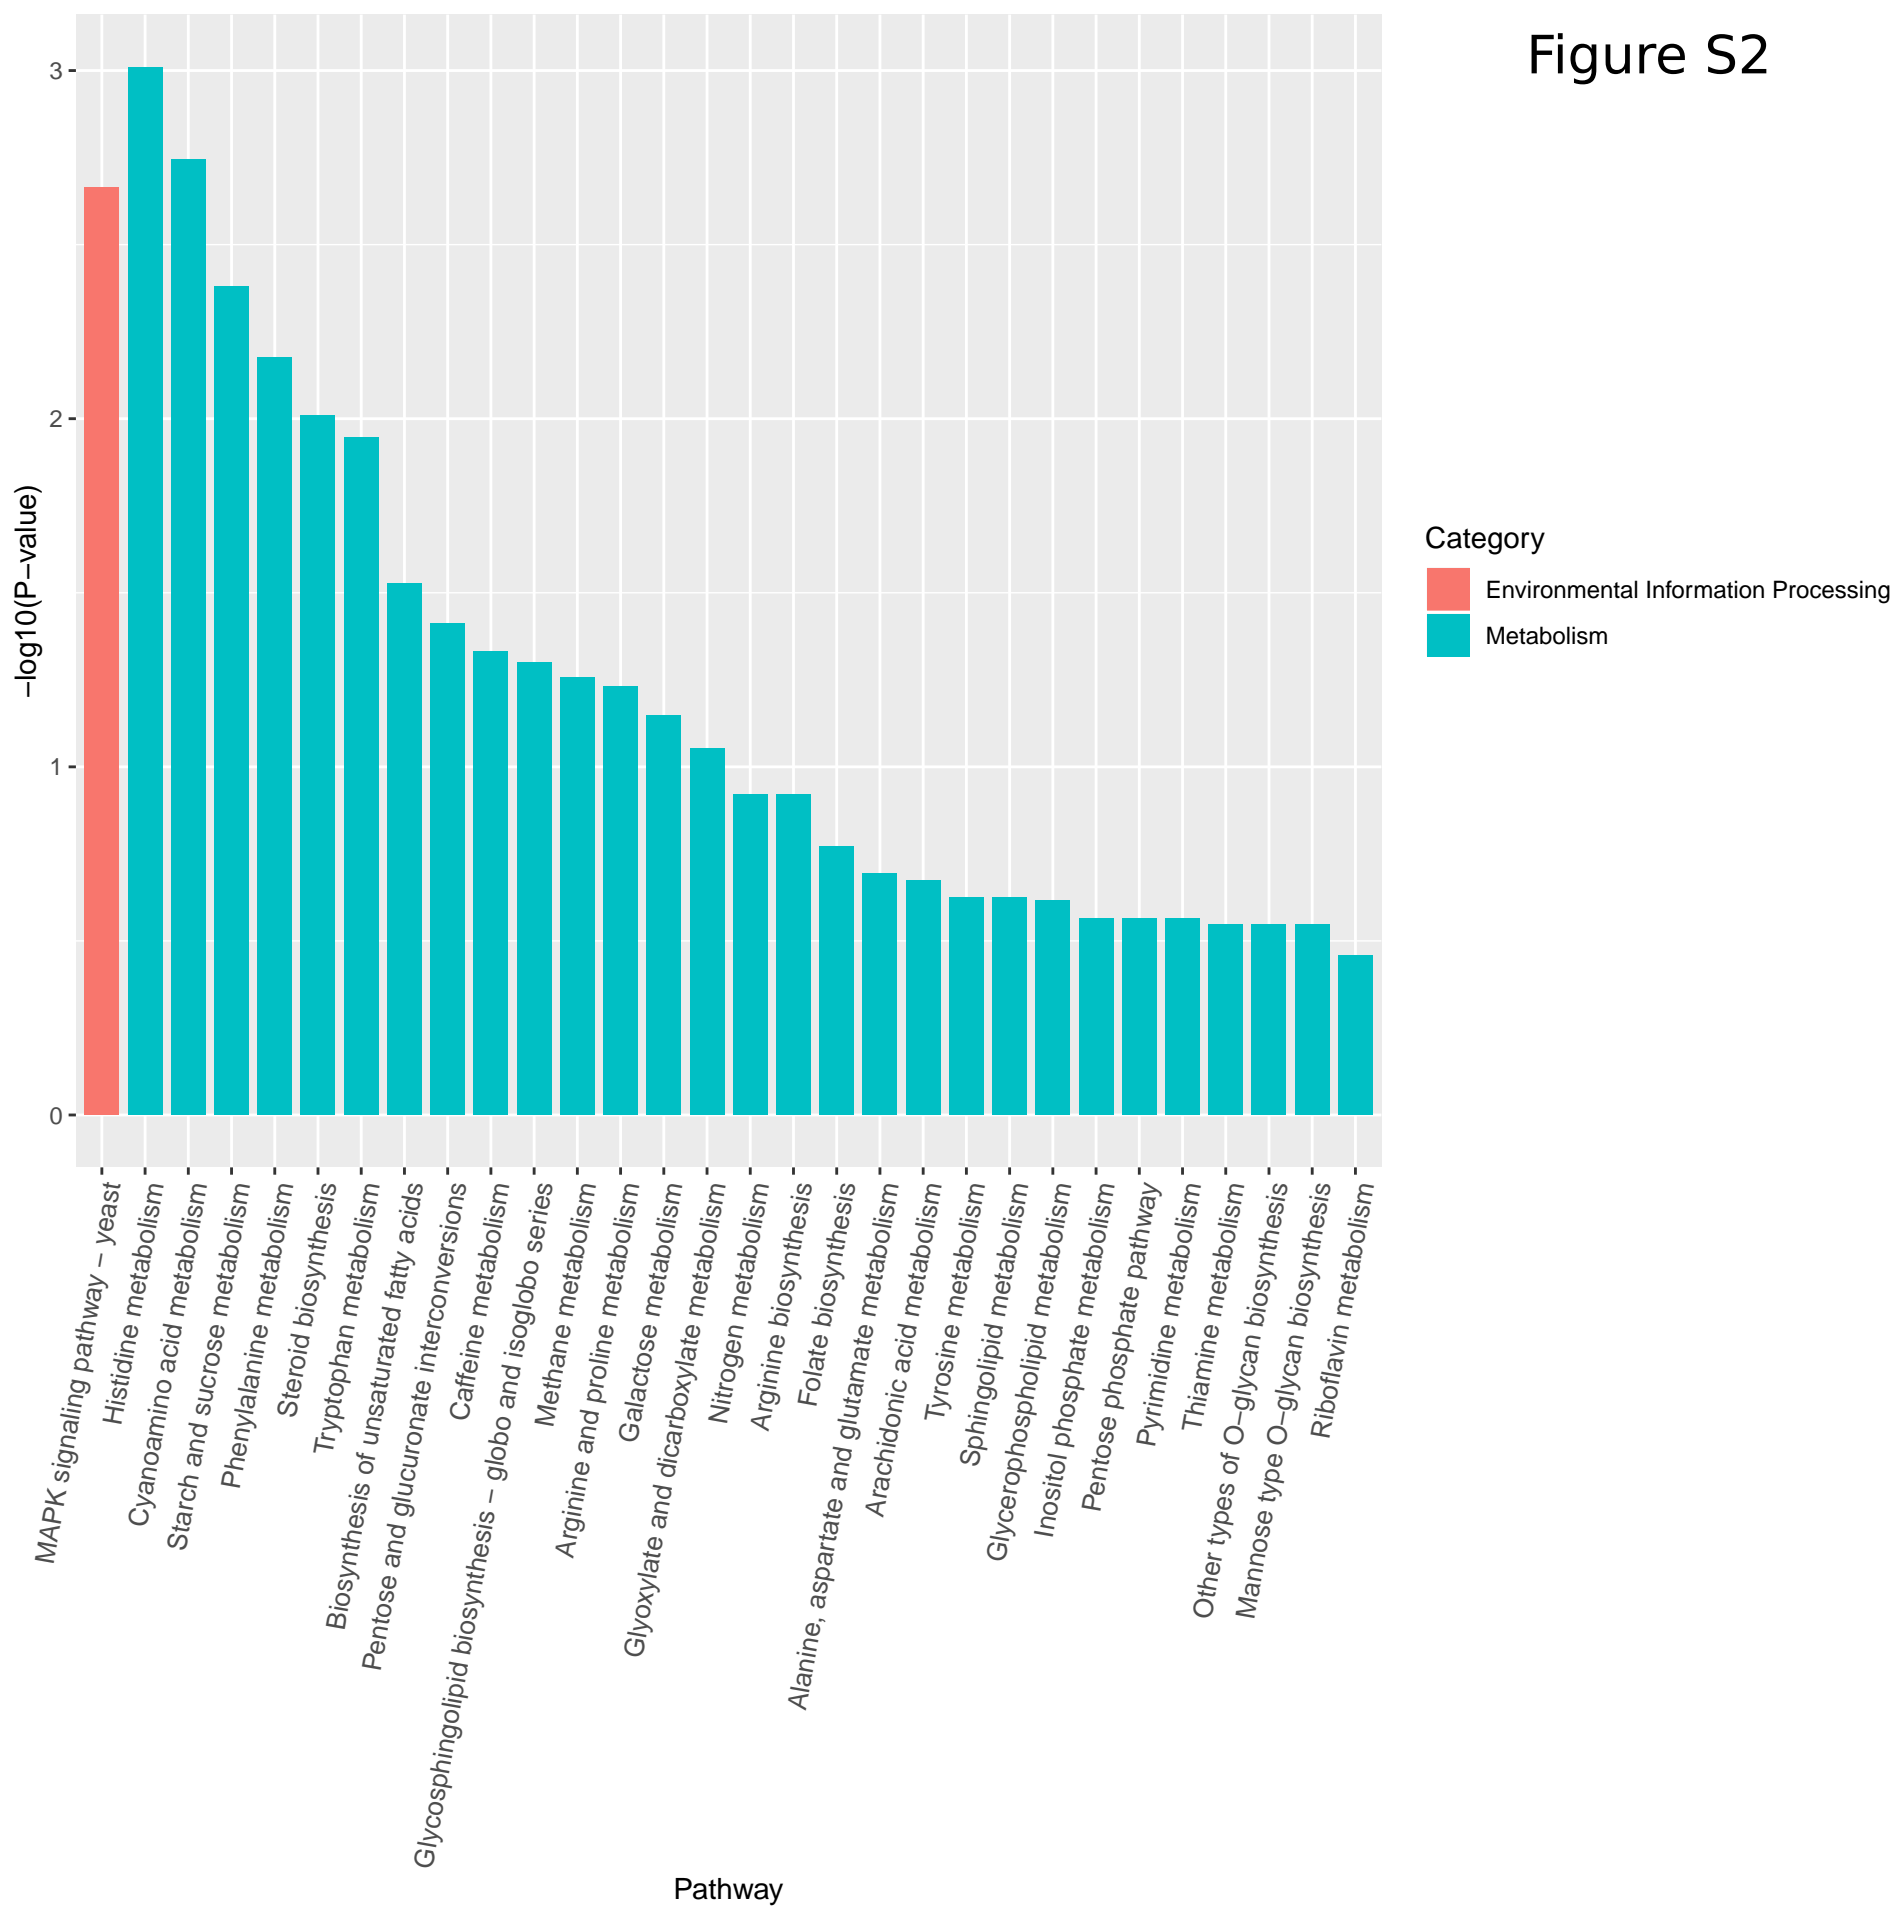

Supplement: spectrum.05272-22-s0004.pdf [file spectrum.05272-22-s0004.pdf]
